# Supplementary material for: Progress and gaps in reproductive health services in three humanitarian settings: mixed-methods case studies
Source: PubMed Central journal article supplement (PMC4331815; doi:10.1186/1752-1505-9-s1-s3), 2015-02-02
Supplement: 1752-1505-9-S1-S3-S1.pdf [file 1752-1505-9-S1-S3-S1.pdf]

## Appendix A: Minimum infection prevention supplies, by country

**Table A1. Burkina Faso: facilities with minimum infection prevention supplies available (n=28)**

|                                                                            | Hospital (n=3)             | Camp health center (n=4) | Non-camp health center (n=21) |
|----------------------------------------------------------------------------|----------------------------|--------------------------|-------------------------------|
| Washing station with soap                                                  | 3 (100%)                   | 3 (100%)<br>ND* (1)      | 21 (100%)                     |
| Plastic sheeting                                                           | 1 (50%)<br>ND* (1)         | 0<br>ND* (1)             | 8 (38.1%)                     |
| Non-sterile gloves                                                         | 3 (100%)                   | 4 (100%)                 | 21 (100%)                     |
| Sterile gloves                                                             | 3 (100%)                   | 4 (100%)                 | 21 (100%)                     |
| Antiseptics                                                                | 3 (100%)                   | 4 (100%)                 | 21 (100%)                     |
| Apron                                                                      | 3 (100%)                   | 2 (50%)                  | 11 (52.4%)                    |
| Autoclave (or other appropriate equipment for sterilization)               | 3 (100%)                   | 2 (66.7%)<br>ND* (1)     | 15 (71.4%)                    |
| Incinerator                                                                | 2 (100%)<br>ND* (1)        | 1 (33.3%)<br>ND* (1)     | 11 (52.4%)                    |
| Sharps are separated from other waste and disposed of properly.            | 3 (100%)                   | 3 (75%)                  | 16 (80%)<br>ND* (1)           |
| <b>Facilities with all minimum infection prevention supplies available</b> | <b>1 (50%)<br/>ND* (1)</b> | <b>0<br/>ND* (1)</b>     | <b>5 (23.8%)</b>              |

\*No data

**Table A2. DRC: facilities with minimum infection prevention supplies available (n=26)**

|                                                                            | Hospital (n=1) | Health center (n=25) |
|----------------------------------------------------------------------------|----------------|----------------------|
| Washing station with soap                                                  | 1              | 18 (75%)             |
| Plastic sheeting                                                           | 1              | 8 (33.3%)            |
| Non-sterile gloves                                                         | 1              | 23 (95.8%)           |
| Sterile gloves                                                             | 1              | 19 (79.2%)           |
| Antiseptics                                                                | 1              | 23 (95.8%)           |
| Apron                                                                      | 1              | 17 (70.8%)           |
| Autoclave (or other appropriate equipment for sterilization)               | 1              | 12 (50%)             |
| Incinerator                                                                | 1              | 16 (64%)             |
| Sharps are separated from other waste and disposed of properly.            | 1              | 15 (60%)             |
| <b>Facilities with all minimum infection prevention supplies available</b> | <b>1</b>       | <b>4 (16%)</b>       |

**Table A3. South Sudan: facilities with minimum infection prevention supplies available (n=9)**

|                                                                            | <b>Hospital (n=1)</b> | <b>Health center (n=8)</b> |
|----------------------------------------------------------------------------|-----------------------|----------------------------|
| Washing station with soap                                                  | 1                     | 5                          |
| Plastic sheeting                                                           | 0                     | 4                          |
| Non-sterile gloves                                                         | 1                     | 5                          |
| Sterile gloves                                                             | 1                     | 5                          |
| Antiseptics                                                                | 1                     | 5                          |
| Apron                                                                      | 1                     | 4                          |
| Autoclave (or other appropriate equipment for sterilization)               | 1                     | 5                          |
| Incinerator                                                                | 1                     | 6                          |
| Sharps are separated from other waste and disposed of properly.            | 1                     | 7                          |
| <b>Facilities with all minimum infection prevention supplies available</b> | <b>0</b>              | <b>4</b>                   |
