# Supplementary material for: Progress and gaps in reproductive health services in three humanitarian settings: mixed-methods case studies
Source: PubMed Central journal article supplement (PMC4331815; doi:10.1186/1752-1505-9-s1-s3), 2015-02-02
Supplement: 1752-1505-9-S1-S3-S2.pdf [file 1752-1505-9-S1-S3-S2.pdf]

## Appendix B: Functioning family planning (FP) service delivery points, by country and by FP method

**Table B1. Burkina Faso: facilities with essential components to provide short- and long-acting FP methods (n=28)**

|                                                       | Hospital<br>(n=3) | Camp health<br>center (n=4) | Non-camp health<br>centers (n=21) |
|-------------------------------------------------------|-------------------|-----------------------------|-----------------------------------|
| <b>ORAL CONTRACEPTIVE PILLS</b>                       |                   |                             |                                   |
| OCPs provided in last 3 months (self-reported)        | 3 (100%)          | 4 (100%)                    | 20 (95.2%)                        |
| Staff trained to provide short-acting FP methods      | 3 (100%)          | 3 (100%) ND* (1)            | 20 (95.2%)                        |
| FP counseling available                               | 3 (100%)          | 4 (100%)                    | 20 (95.2%)                        |
| BP cuff                                               | 3 (100%)          | 4 (100%)                    | 19 (90.5%)                        |
| Stethoscope                                           | 3 (100%)          | 4 (100%)                    | 21 (100%)                         |
| Daily oral contraceptive pills                        | 3 (100%)          | 4 (100%)                    | 20 (95.2%)                        |
| <b>Functioning OCP service delivery point</b>         | <b>3 (100%)</b>   | <b>3 (100%) ND* (1)</b>     | <b>17 (81%)</b>                   |
| <b>INJECTABLES</b>                                    |                   |                             |                                   |
| Injectables provided in last 3 months (self-reported) | 3 (100%)          | 4 (100%)                    | 20 (95.2%)                        |
| Staff trained to provide short-acting FP methods      | 3 (100%)          | 3 (100%) ND* (1)            | 20 (95.2%)                        |
| FP counseling available                               | 3 (100%)          | 4 (100%)                    | 20 (95.2%)                        |
| BP cuff                                               | 3 (100%)          | 4 (100%)                    | 19 (90.5%)                        |
| Stethoscope                                           | 3 (100%)          | 4 (100%)                    | 21 (100%)                         |
| Needles and syringes                                  | 3 (100%)          | 4 (100%)                    | 21 (100%)                         |
| Injectable contraceptive (progestin-only)             | 3 (100%)          | 4 (100%)                    | 20 (95.2%)                        |
| <b>Functioning injectable service delivery point</b>  | <b>3 (100%)</b>   | <b>3 (100%) ND* (1)</b>     | <b>17 (81%)</b>                   |
| <b>IUD</b>                                            |                   |                             |                                   |
| IUD inserted in last 3 months (self-reported)         | 3 (100%)          | 1 (25%)                     | 4 (19%)                           |
| Staff trained to provide long-acting methods          | 3 (100%)          | 3 (100%) ND* (1)            | 17 (85%) ND* (1)                  |
| FP counseling available                               | 3 (100%)          | 4 (100%)                    | 20 (95.2%)                        |
| Sterile gloves                                        | 3 (100%)          | 4 (100%)                    | 21 (100%)                         |
| Speculum                                              | 3 (100%)          | 4 (100%)                    | 20 (95.2%)                        |
| Uterine sound                                         | 3 (100%)          | 3 (75%)                     | 5 (23.8%)                         |
| Uterine tenaculum                                     | 3 (100%)          | 1 (25%)                     | 6 (30%) ND* (1)                   |
| Sponge forceps                                        | 3 (100%)          | 2 (50%)                     | 13 (61.9%)                        |
| Antiseptics                                           | 3 (100%)          | 4 (100%)                    | 21 (100%)                         |
| IUD (copper or levonorgestrel)                        | 3 (100%)          | 1 (25%)                     | 10 (47.6%)                        |
| <b>Functioning IUD service delivery point</b>         | <b>3 (100%)</b>   | <b>1 (25%)</b>              | <b>1 (4.8%)</b>                   |
| <b>IMPLANT</b>                                        |                   |                             |                                   |
| Implant inserted in last 3 months (self-reported)     | 3 (100%)          | 4 (100%)                    | 19 (90.5%)                        |
| Staff trained to provide long-acting methods          | 3 (100%)          | 3 (100%) ND* (1)            | 17 (85%) ND* (1)                  |
| FP counseling available                               | 3 (100%)          | 4 (100%)                    | 20 (95.2%)                        |
| Sponge forceps                                        | 3 (100%)          | 2 (50%)                     | 13 (61.9%)                        |
| Scalpel handle (No. 3) and blade                      | 3 (100%)          | 3 (75%)                     | 16 (76.2%)                        |
| Needles and syringes                                  | 3 (100%)          | 4 (100%)                    | 21 (100%)                         |
| Antiseptics                                           | 3 (100%)          | 4 (100%)                    | 21 (100%)                         |
| Implant                                               | 3 (100%)          | 4 (100%)                    | 20 (95.2%)                        |
| <b>Functioning implant service delivery point</b>     | <b>3 (100%)</b>   | <b>1 (25%)</b>              | <b>8 (40%) ND* (1)</b>            |

\*No data

**Table B2. DRC: facilities with essential components to provide short- and long-acting FP methods (n=26)**

|                                                       | Hospital (n=1) | Health center (n=25) |
|-------------------------------------------------------|----------------|----------------------|
| <b>ORAL CONTRACEPTIVE PILLS</b>                       |                |                      |
| OCPs provided in last 3 months (self-reported)        | 1              | 18 (72%)             |
| Staff trained to provide short-acting FP methods      | 1              | 16 (66.7%) ND* (1)   |
| FP counseling available                               | 1              | 19 (76%)             |
| BP cuff                                               | 1              | 20 (83.3%) ND* (1)   |
| Stethoscope                                           | 1              | 22 (91.7%) ND* (1)   |
| Daily oral contraceptive pills                        | 1              | 15 (62.5%) ND* (1)   |
| <b>Functioning OCP service delivery point</b>         | <b>1</b>       | <b>12 (48%)</b>      |
| <b>INJECTABLES</b>                                    |                |                      |
| Injectables provided in last 3 months (self-reported) | 1              | 18 (72%) ND* (1)     |
| Staff trained to provide short-acting FP methods      | 1              | 16 (66.7%) ND* (1)   |
| FP counseling available                               | 1              | 19 (76%)             |
| BP cuff                                               | 1              | 20 (83.3%) ND* (1)   |
| Stethoscope                                           | 1              | 22 (91.7%) ND* (1)   |
| Needles and syringes                                  | 1              | 23 (95.8%) ND* (1)   |
| Injectable contraceptive (progestin-only)             | 1              | 13 (54.2%) ND* (1)   |
| <b>Functioning injectable service delivery point</b>  | <b>1</b>       | <b>10 (40%)</b>      |
| <b>IUD</b>                                            |                |                      |
| IUD inserted in last 3 months (self-reported)         | 1              | 12 (48%)             |
| Staff trained to provide long-acting methods          | 1              | 15 (62.5%) ND* (1)   |
| FP counseling available                               | 1              | 19 (76%)             |
| Sterile gloves                                        | 1              | 19 (79.2%) ND* (1)   |
| Speculum                                              | 1              | 14 (58.3%) ND* (1)   |
| Uterine sound                                         | 1              | 10 (41.7%) ND* (1)   |
| Uterine tenaculum                                     | 1              | 11 (45.8%) ND* (1)   |
| Sponge forceps                                        | 1              | 11 (45.8%) ND* (1)   |
| Antiseptics                                           | 1              | 23 (95.8%) ND* (1)   |
| IUD (copper or levonorgestrel)                        | 1              | 11 (45.8%) ND* (1)   |
| <b>Functioning IUD service delivery point</b>         | <b>1</b>       | <b>9 (36%)</b>       |
| <b>IMPLANT</b>                                        |                |                      |
| Implant inserted in last 3 months (self-reported)     | 1              | 15 (60%)             |
| Staff trained to provide long-acting methods          | 1              | 15 (62.5%) ND* (1)   |
| FP counseling available                               | 1              | 19 (76%)             |
| Sponge forceps                                        | 1              | 11 (45.8%) ND* (1)   |
| Scalpel handle (No. 3) and blade                      | 1              | 11 (45.8%) ND* (1)   |
| Needles and syringes                                  | 1              | 23 (95.8%) ND* (1)   |
| Antiseptics                                           | 1              | 23 (95.8%) ND* (1)   |
| Implant                                               | 1              | 13 (54.2%) ND* (1)   |
| <b>Functioning implant service delivery point</b>     | <b>1</b>       | <b>5 (20%)</b>       |

\*No data

**Table B3. South Sudan: facilities with essential components to provide short- and long-acting FP methods (n=9)**

|                                                       | Hospital (n=1) | Health center (n=8) |
|-------------------------------------------------------|----------------|---------------------|
| <b>ORAL CONTRACEPTIVE PILLS</b>                       |                |                     |
| OCPs provided in last 3 months (self-reported)        | 0              | 5                   |
| Staff trained to provide short-acting FP methods      | 1              | 4 ND* (3)           |
| FP counseling available                               | 1              | 6                   |
| BP cuff                                               | 1              | 8                   |
| Stethoscope                                           | 1              | 8                   |
| Daily oral contraceptive pills                        | ND*            | 3 ND* (1)           |
| <b>Functioning OCP service delivery point</b>         | <b>0</b>       | <b>1</b>            |
| <b>INJECTABLES</b>                                    |                |                     |
| Injectables provided in last 3 months (self-reported) | 1              | 4                   |
| Staff trained to provide short-acting FP methods      | 1              | 4 ND* (3)           |
| FP counseling available                               | 1              | 6                   |
| BP cuff                                               | 1              | 8                   |
| Stethoscope                                           | 1              | 8                   |
| Needles and syringes                                  | 1              | 7                   |
| Injectable contraceptive (progestin-only)             | ND*            | 3 ND* (1)           |
| <b>Functioning injectable service delivery point</b>  | <b>ND</b>      | <b>1</b>            |
| <b>IUD</b>                                            |                |                     |
| IUD inserted in last 3 months (self-reported)         | 0              | 0                   |
| Staff trained to provide long-acting methods          | 0              | 3                   |
| FP counseling available                               | 1              | 6                   |
| Sterile gloves                                        | 1              | 8                   |
| Speculum                                              | 1              | 6                   |
| Uterine sound                                         | 1              | 4 ND* (1)           |
| Uterine tenaculum                                     | 1              | 4 ND* (1)           |
| Sponge forceps                                        | 1              | 4 ND* (1)           |
| Antiseptics                                           | 1              | 8                   |
| IUD (copper or levonorgestrel)                        | ND*            | 0 ND* (1)           |
| <b>Functioning IUD service delivery point</b>         | <b>0</b>       | <b>0</b>            |
| <b>IMPLANT</b>                                        |                |                     |
| Implant inserted in last 3 months (self-reported)     | 0              | 1                   |
| Staff trained to provide long-acting methods          | 0              | 3                   |
| FP counseling available                               | 1              | 6                   |
| Sponge forceps                                        | 1              | 4 ND* (1)           |
| Scalpel handle (No. 3) and blade                      | 0              | 5 ND* (2)           |
| Needles and syringes                                  | 1              | 7                   |
| Antiseptics                                           | 1              | 8                   |
| Implant                                               | ND*            | 2 ND* (1)           |
| <b>Functioning implant service delivery point</b>     | <b>0</b>       | <b>0</b>            |

\*No data
