# Supplementary material for: Progress and gaps in reproductive health services in three humanitarian settings: mixed-methods case studies
Source: PubMed Central journal article supplement (PMC4331815; doi:10.1186/1752-1505-9-s1-s3), 2015-02-02
Supplement: 1752-1505-9-S1-S3-S4.pdf [file 1752-1505-9-S1-S3-S4.pdf]

## Appendix D: Facilities able to provide essential elements of newborn care, by country

**Table D1. Burkina Faso: facilities with components to provide essential elements of newborn care (n=28)**

|                                                                                 | Hospital (n=3)   | Camp health center (n=4) | Non-camp health center (n=21) |
|---------------------------------------------------------------------------------|------------------|--------------------------|-------------------------------|
| Neonatal resuscitation with appropriate bag and mask performed in last 3 months | 3 (100%)         | 3 (75%)                  | 11 (52.4%)                    |
| At least one provider trained to provide:                                       |                  |                          |                               |
| Newborn infection management (including injectable antibiotics)                 | 3 (100%)         | 3 (75%)                  | 12 (57.1%)                    |
| Thermal care (including immediate drying and skin-to-skin care)                 | 3 (100%)         | 3 (75%)                  | 17 (81%)                      |
| Sterile cord cutting and appropriate cord care                                  | 3 (100%)         | 4 (100%)                 | 17 (81%)                      |
| Kangaroo care for low birth weight babies                                       | 3 (100%)         | 4 (100%)                 | 18 (85.7%)                    |
| Special delivery care practices to prevent mother-to-child transmission of HIV  | 3 (100%)         | 4 (100%)                 | 20 (95.2%)                    |
| Breastfeeding (early and exclusive)                                             | 2 (66.7%)        | 3 (75%)                  | 15 (71.4%)                    |
| Partograph                                                                      | 3 (100%)         | 3 (75%)                  | 21 (100%)                     |
| Resuscitation bag and infant face mask                                          | 3 (100%)         | 1 (25%)                  | 12 (57.1%)                    |
| Infant scale                                                                    | 3 (100%)         | 3 (75%)                  | 21 (100%)                     |
| Fetoscope                                                                       | 3 (100%)         | 4 (100%)                 | 21 (100%)                     |
| Corticosteroids (dexamethasone)                                                 | 3 (100%)         | 3 (75%)                  | 4 (20%)<br>ND* (1)            |
| Ampicillin injectable                                                           | 3 (100%)         | 4 (100%)                 | 21 (100%)                     |
| Gentamycin injectable                                                           | 3 (100%)         | 3 (75%)                  | 21 (100%)                     |
| Ceftriaxone injectable                                                          | 3 (100%)         | 4 (100%)                 | 21 (100%)                     |
| <b>Facilities with all minimum elements of essential newborn care</b>           | <b>2 (66.7%)</b> | <b>1 (25%)</b>           | <b>2 (9.5%)</b>               |

\*No data

**Table D2. DRC: facilities with components to provide essential elements of newborn care (n=26)**

|                                                                                 | Hospital (n=1) | Health center (n=25) |
|---------------------------------------------------------------------------------|----------------|----------------------|
| Neonatal resuscitation with appropriate bag and mask performed in last 3 months | 1              | 6 (25%) ND*(1)       |
| At least one provider trained to provide:                                       |                |                      |
| Newborn infection management (including injectable antibiotics)                 | 1              | 8 (34.8%) ND* (2)    |
| Thermal care (including immediate drying and skin-to-skin care)                 | 1              | 13 (56.5%) ND* (2)   |
| Sterile cord cutting and appropriate cord care                                  | 1              | 20 (87%) ND* (2)     |
| Kangaroo care for low birth weight babies                                       | 1              | 18 (78.3%) ND* (2)   |
| Special delivery care practices to prevent mother-to-child transmission of HIV  | 1              | 10 (43.5%) ND* (2)   |
| Breastfeeding (early and exclusive)                                             | 1              | 14 (60.7%) ND*(2)    |
| Partograph                                                                      | 1              | 21 (87.5%) ND* (1)   |
| Resuscitation bag and infant face mask                                          | 1              | 8 (33.3%) ND* (1)    |
| Infant scale                                                                    | 1              | 14 (58.3%) ND* (1)   |
| Fetoscope                                                                       | 1              | 17 (70.8%) ND* (1)   |
| Corticosteroids (dexamethasone)                                                 | 1              | 5 (20.8%) ND* (1)    |
| Ampicillin injectable                                                           | 1              | 7 (29.2%) ND* (1)    |
| Gentamycin injectable                                                           | 1              | 6 (25%) ND* (1)      |
| Ceftriaxone injectable                                                          | 1              | 3 (13%) ND* (2)      |
| <b>Facilities with all minimum elements of essential newborn care</b>           | <b>1</b>       | <b>0</b>             |

\*No data

**Table D3. South Sudan: facilities with components to provide essential elements of newborn care (n=9)**

|                                                                                 | Hospital (n=1) | Health center (n=8) |
|---------------------------------------------------------------------------------|----------------|---------------------|
| Neonatal resuscitation with appropriate bag and mask performed in last 3 months | 1              | 5                   |
| At least one provider trained to provide:                                       |                |                     |
| Newborn infection management (including injectable antibiotics)                 | 0              | 5                   |
| Thermal care (including immediate drying and skin-to-skin care)                 | 0              | 6                   |
| Sterile cord cutting and appropriate cord care                                  | 1              | 6                   |
| Kangaroo care for low birth weight babies                                       | 0              | 6                   |
| Special delivery care practices to prevent mother-to-child transmission of HIV  | 1              | 3                   |
| Breastfeeding (early and exclusive)                                             | 0              | 7                   |
| Partograph                                                                      | 0              | 4                   |
| Resuscitation bag and infant face mask                                          | 1              | 5                   |
| Infant scale                                                                    | 1              | 5                   |
| Fetoscope                                                                       | 1              | 7                   |
| Corticosteroids (dexamethasone)                                                 | ND*            | 4 ND* (1)           |
| Ampicillin injectable                                                           | ND*            | 4 ND* (1)           |
| Gentamycin injectable                                                           | ND*            | 6 ND* (1)           |
| Ceftriaxone injectable                                                          | ND*            | 6 ND* (1)           |
| <b>Facilities with all minimum elements of essential newborn care</b>           | <b>0</b>       | <b>2</b>            |

\*No data
