# Supplementary material for: Progress and gaps in reproductive health services in three humanitarian settings: mixed-methods case studies
Source: PubMed Central journal article supplement (PMC4331815; doi:10.1186/1752-1505-9-s1-s3), 2015-02-02
Supplement: 1752-1505-9-S1-S3-S5.pdf [file 1752-1505-9-S1-S3-S5.pdf]

## Appendix E: Functioning post-abortion care (PAC) service delivery points, by country

Table E1. Burkina Faso: facilities with essential components to provide PAC (n=28)

|                                                                                                                                  | Hospital (n=3)  | Camp health center (n=4) | Non-camp health center (n=21) |
|----------------------------------------------------------------------------------------------------------------------------------|-----------------|--------------------------|-------------------------------|
| <b>COUNSELING &amp; FAMILY PLANNING</b>                                                                                          |                 |                          |                               |
| PAC counseling is available                                                                                                      | 3 (100%)        | 4 (100%)                 | 21 (100%)                     |
| Family planning is offered to all clients who receive PAC services before they are discharged from the facility                  | 3 (100%)        | 4 (100%)                 | 21 (100%)                     |
| <b>Facilities with minimum essential elements to provide counseling and family planning for clients who receive PAC services</b> | <b>3 (100%)</b> | <b>4 (100%)</b>          | <b>21 (100%)</b>              |
| <b>PAC WITH MANUAL VACUUM ASPIRATION (MVA)</b>                                                                                   |                 |                          |                               |
| PAC performed in last 3 months using MVA                                                                                         | 3 (100%)        | 1 (25%)                  | 4 (19%)                       |
| At least 1 trained staff to provide PAC                                                                                          | 3 (100%)        | 2 (100%)<br>ND* (2)      | 16 (94.12%)<br>ND* (4)        |
| Vaginal speculum                                                                                                                 | 3 (100%)        | 4 (100%)                 | 20 (95.2%)                    |
| Sponge forceps                                                                                                                   | 3 (100%)        | 2 (50%)                  | 13 (61.9%)                    |
| Uterine tenaculum                                                                                                                | 3 (100%)        | 1 (25%)                  | 6 (30%)<br>ND* (1)            |
| MVA syringe, adapters and cannulae                                                                                               | 3 (100%)        | 1 (33.3%)<br>ND* (1)     | 4 (19%)                       |
| Antiseptic solution                                                                                                              | 3 (100%)        | 4 (100%)                 | 21 (100%)                     |
| Non-sterile Gloves                                                                                                               | 3 (100%)        | 4 (100%)                 | 21 (100%)                     |
| Oxytocin                                                                                                                         | 3 (100%)        | 4 (100%)                 | 21 (100%)                     |
| Needles and syringes                                                                                                             | 3 (100%)        | 4 (100%)                 | 21 (100%)                     |
| <b>Facilities with minimum essential elements to provide PAC with MVA and provided in the previous three months</b>              | <b>3 (100%)</b> | <b>1 (25%)</b>           | <b>0 (0%)</b>                 |
| <b>PAC WITH MISOPROSTOL</b>                                                                                                      |                 |                          |                               |
| PAC performed in last 3 months using misoprostol                                                                                 | 2 (66.7%)       | 1 (25%)                  | 0                             |
| At least 1 trained staff to provide PAC                                                                                          | 3 (100%)        | 2 (100%)<br>ND* (2)      | 16 (94.1%)<br>ND* (4)         |
| Misoprostol                                                                                                                      | 0               | 0                        | 1 (4.8%)                      |
| <b>Facilities with minimum essential elements to provide PAC with misoprostol and provided in the previous three months</b>      | <b>0</b>        | <b>0</b>                 | <b>0</b>                      |
| <b>PROVISION OF PAC TO AN ACCEPTABLE STANDARD</b>                                                                                |                 |                          |                               |
| FP is offered to all PAC clients                                                                                                 | 3 (100%)        | 4 (100%)                 | 21 (100%)                     |
| PAC with MVA                                                                                                                     | 3 (100%)        | 1 (25%)                  | 0 (0%)                        |
| PAC with misoprostol ( <i>optional</i> )                                                                                         | 0               | 0                        | 0                             |
| <b>Functioning PAC service delivery point</b>                                                                                    | <b>3 (100%)</b> | <b>1 (25%)</b>           | <b>0 (0%)</b>                 |

\*No data

**Table E2. DRC: facilities with essential components to provide PAC (n=26)**

|                                                                                                                                  | Hospital (n=1) | Health center (n=26) |
|----------------------------------------------------------------------------------------------------------------------------------|----------------|----------------------|
| <b>COUNSELING &amp; FAMILY PLANNING</b>                                                                                          |                |                      |
| PAC counseling is available                                                                                                      | 1              | 17 (68%)             |
| Family planning is offered to all clients who receive PAC services before they are discharged from the facility                  | 1              | 13 (54.2%) ND* (1)   |
| <b>Facilities with minimum essential elements to provide counseling and family planning for clients who receive PAC services</b> | <b>1</b>       | <b>13 (52%)</b>      |
| <b>PAC WITH MANUAL VACUUM ASPIRATION (MVA)</b>                                                                                   |                |                      |
| PAC performed in last 3 months using MVA                                                                                         | 1              | 11 (45.8%) ND* (1)   |
| At least 1 trained staff to provide PAC                                                                                          | 1              | 14 (58.3%) ND* (1)   |
| Vaginal speculum                                                                                                                 | 1              | 14 (58.3%) ND* (1)   |
| Sponge forceps                                                                                                                   | 1              | 11 (45.8%) ND* (1)   |
| Uterine tenaculum                                                                                                                | 1              | 11 (45.8%) ND* (1)   |
| MVA syringe, adapters and cannulae                                                                                               | 1              | 11 (45.8%) ND* (1)   |
| Antiseptic solution                                                                                                              | 1              | 23 (95.8%) ND* (1)   |
| Non-sterile Gloves                                                                                                               | 1              | 23 (95.8%) ND* (1)   |
| Oxytocin                                                                                                                         | 1              | 20 (83.3%) ND* (1)   |
| Needles and syringes                                                                                                             | 1              | 23 (95.8%) ND* (1)   |
| <b>Facilities with minimum essential elements to provide PAC with MVA and provided in the previous three months</b>              | <b>1</b>       | <b>9 (38%)</b>       |
| <b>PAC WITH MISOPROSTOL</b>                                                                                                      |                |                      |
| PAC performed in last 3 months using misoprostol                                                                                 | 1              | 2 (8%)               |
| At least 1 trained staff to provide PAC                                                                                          | 1              | 14 (58.3%) ND* (1)   |
| Misoprostol                                                                                                                      | 1              | 2 (8.3%) ND* (1)     |
| <b>Facilities with minimum essential elements to provide PAC with misoprostol and provided in the previous three months</b>      | <b>1</b>       | <b>2 (8%)</b>        |
| <b>PROVISION OF PAC TO AN ACCEPTABLE STANDARD</b>                                                                                |                |                      |
| FP is offered to all PAC clients                                                                                                 | 1              | 13 (52%) ND* (1)     |
| PAC with MVA                                                                                                                     | 1              | 9 (37.5%) ND* (1)    |
| PAC with misoprostol ( <i>optional</i> )                                                                                         | 1              | 2 (8%) ND* (1)       |
| <b>Functioning PAC service delivery point</b>                                                                                    | <b>1</b>       | <b>11 (44%)</b>      |

\*No data

**Table E3. South Sudan: facilities with essential components to provide PAC (n=9)**

|                                                                                                                                  | Hospital (n=1) | Health center (n=8) |
|----------------------------------------------------------------------------------------------------------------------------------|----------------|---------------------|
| <b>COUNSELING &amp; FAMILY PLANNING</b>                                                                                          |                |                     |
| PAC counseling is available                                                                                                      | 1              | 4                   |
| Family planning is offered to all clients who receive PAC services before they are discharged from the facility                  | 1              | 3                   |
| <b>Facilities with minimum essential elements to provide counseling and family planning for clients who receive PAC services</b> | <b>1</b>       | <b>3</b>            |
| <b>PAC WITH MANUAL VACUUM ASPIRATION (MVA)</b>                                                                                   |                |                     |
| PAC performed in last 3 months using MVA                                                                                         | 1              | 3                   |
| At least 1 trained staff to provide PAC                                                                                          | 1              | 3 ND* (3)           |
| Vaginal speculum                                                                                                                 | 1              | 6                   |
| Sponge forceps                                                                                                                   | 1              | 4 ND* (1)           |
| Uterine tenaculum                                                                                                                | 1              | 4 ND* (1)           |
| MVA syringe, adapters and cannulae                                                                                               | 1              | 4                   |
| Antiseptic solution                                                                                                              | 1              | 8                   |
| Non-sterile Gloves                                                                                                               | 1              | 8                   |
| Oxytocin                                                                                                                         | 1              | 5                   |
| Needles and syringes                                                                                                             | 1              | 7                   |
| <b>Facilities with minimum essential elements to provide PAC with MVA and provided in the previous three months</b>              | <b>1</b>       | <b>1</b>            |
| <b>PAC WITH MISOPROSTOL</b>                                                                                                      |                |                     |
| PAC performed in last 3 months using misoprostol                                                                                 | 1              | 3                   |
| At least 1 trained staff to provide PAC                                                                                          | 1              | 3 ND* (3)           |
| Misoprostol                                                                                                                      | ND*            | 3 ND* (1)           |
| <b>Facilities with minimum elements to provide PAC with misoprostol and provided in the previous three months</b>                | <b>ND*</b>     | <b>1</b>            |
| <b>PROVISION OF PAC TO AN ACCEPTABLE STANDARD</b>                                                                                |                |                     |
| FP is offered to all PAC clients                                                                                                 | 1              | 3                   |
| PAC with MVA                                                                                                                     | 1              | 1                   |
| PAC with misoprostol ( <i>optional</i> )                                                                                         | ND*            | 1                   |
| <b>Functioning PAC service delivery point</b>                                                                                    | <b>1</b>       | <b>1</b>            |

\*No data
