# Supplementary material for: Progress and gaps in reproductive health services in three humanitarian settings: mixed-methods case studies
Source: PubMed Central journal article supplement (PMC4331815; doi:10.1186/1752-1505-9-s1-s3), 2015-02-02
Supplement: 1752-1505-9-S1-S3-S6.pdf [file 1752-1505-9-S1-S3-S6.pdf]

## Appendix F: Facilities able to provide selected elements of clinical management of rape (CMoR), by country

Table F1. Burkina Faso: Facilities able to provide selected elements of clinical management of rape (n=28)

|                                                                     | Hospital (n=3)   | Camp health center (n=4)     | Non-camp health center (n=21) |
|---------------------------------------------------------------------|------------------|------------------------------|-------------------------------|
| <b>POST-EXPOSURE PROPHYLAXIS (PEP)</b>                              |                  |                              |                               |
| Provision of PEP for CMoR in last 3 months                          | 2 (66.7%)        | 3 (75%)                      | 5 (23.8%)                     |
| PEP                                                                 | 3 (100%)         | 0                            | 0                             |
| <b>Facilities with minimum elements to provide PEP</b>              | <b>2 (66.7%)</b> | <b>0</b>                     | <b>0</b>                      |
| <b>EMERGENCY CONTRACEPTION</b>                                      |                  |                              |                               |
| Provision of EC for CMoR in last 3 months                           | 2 (66.7%)        | 4 (100%)                     | 7 (33.3%)                     |
| EC                                                                  | 0                | 2 (66.7%)<br>ND* (1)         | 7 (33.3%)                     |
| <b>Facilities with minimum elements to provide EC</b>               | <b>0</b>         | <b>2 (66.7%)<br/>ND* (1)</b> | <b>6 (28.6%)</b>              |
| <b>ANTIBIOTICS FOR SEXUALLY TRANSMITTED INFECTIONS (STIs)</b>       |                  |                              |                               |
| Provision of antibiotics for presumptive treatment of STIs for CMoR | 2 (66.7%)        | 4 (100%)                     | 9 (42.9%)                     |
| Gentamycin                                                          | 3 (100%)         | 3 (75%)                      | 21 (100%)                     |
| Ceftriaxone                                                         | 3 (100%)         | 4 (100%)                     | 21 (100%)                     |
| Injectable metronidazole                                            | 3 (100%)         | 2 (50%)                      | 21 (100%)                     |
| <b>Facilities with minimum elements to antibiotics for STIs</b>     | <b>2 (66.7%)</b> | <b>2 (50%)</b>               | <b>9 (42.9%)</b>              |

\*No data

**Table F2. DRC: Facilities able to provide selected elements of clinical management of rape (n=26)**

|                                                                         | Hospital (n=1) | Health center (n=25) |
|-------------------------------------------------------------------------|----------------|----------------------|
| <b>POST-EXPOSURE PROPHYLAXIS (PEP)</b>                                  |                |                      |
| Provision of PEP for CMoR in last 3 months                              | 1              | 17 (68%)             |
| PEP                                                                     | 1              | 11 (45.8%) ND* (1)   |
| <b>Facilities with minimum elements to provide PEP</b>                  | <b>1</b>       | <b>10 (40%)</b>      |
| <b>EMERGENCY CONTRACEPTION</b>                                          |                |                      |
| Provision of EC for CMoR in last 3 months                               | 1              | 17 (68%)             |
| EC                                                                      | 1              | 13 (54.2%) ND* (1)   |
| <b>Facilities with minimum elements to provide EC</b>                   | <b>1</b>       | <b>12 (48%)</b>      |
| <b>ANTIBIOTICS FOR SEXUALLY TRANSMITTED INFECTIONS (STIs)</b>           |                |                      |
| Provision of antibiotics for presumptive treatment of STIs for CMoR     | 1              | 20 (80%)             |
| Gentamycin                                                              | 1              | 10 (40%) ND* (1)     |
| Ceftriaxone                                                             | 1              | 12 (48%)             |
| Injectable metronidazole                                                | 1              | 2 (8%)               |
| <b>Facilities with minimum elements to provide antibiotics for STIs</b> | <b>1</b>       | <b>2 (8%)</b>        |

\*No data

**Table F3. South Sudan: Facilities able to provide selected elements of clinical management of rape (n=9)**

|                                                                         | Hospital (n=1) | Health center (n=8) |
|-------------------------------------------------------------------------|----------------|---------------------|
| <b>POST-EXPOSURE PROPHYLAXIS (PEP)</b>                                  |                |                     |
| Provision of PEP for CMoR in last 3 months                              | 0              | 2                   |
| PEP                                                                     | 0              | 1 ND* (1)           |
| <b>Facilities with minimum elements to provide PEP</b>                  | <b>0</b>       | <b>1 ND* (1)</b>    |
| <b>EMERGENCY CONTRACEPTION</b>                                          |                |                     |
| Provision of EC for CMoR in last 3 months                               | 0              | 2                   |
| EC                                                                      | ND* (1)        | 2 ND* (2)           |
| <b>Facilities with minimum elements to provide EC</b>                   | <b>0</b>       | <b>1 ND* (1)</b>    |
| <b>ANTIBIOTICS FOR SEXUALLY TRANSMITTED INFECTIONS (STIs)</b>           |                |                     |
| Provision of antibiotics for presumptive treatment of STIs for CMoR     | 0              | 4                   |
| Gentamycin                                                              | 0              | 6 ND* (1)           |
| Ceftriaxone                                                             | 0              | 6 ND* (1)           |
| Injectable metronidazole                                                | 0              | 4 ND* (1)           |
| <b>Facilities with minimum elements to provide antibiotics for STIs</b> | <b>0</b>       | <b>2</b>            |

\*No data
