# Supplementary material for: Progress and gaps in reproductive health services in three humanitarian settings: mixed-methods case studies
Source: PubMed Central journal article supplement (PMC4331815; doi:10.1186/1752-1505-9-s1-s3), 2015-02-02
Supplement: 1752-1505-9-S1-S3-S7.pdf [file 1752-1505-9-S1-S3-S7.pdf]

## Appendix G: Facilities with essential supplies for diagnosis and treatment of sexually transmitted infections (STIs) and prevention of mother-to-child transmission of HIV (PMTCT), by country

**Table G1. Burkina Faso: Facilities with essential supplies for diagnosis and treatment of STIs and for PMTCT (n=28)**

|                                                                                      | Hospital<br>(n=3) | Camp health<br>center (n=4) | Non-camp health<br>center (n=21)  |
|--------------------------------------------------------------------------------------|-------------------|-----------------------------|-----------------------------------|
| <b>DIAGNOSIS &amp; TREATMENT OF STIs</b>                                             |                   |                             |                                   |
| Performed syndromic or laboratory diagnosis and treatment of STIs in last 3 months   | 2 (67%)           | 4 (100%)                    | 21 (100%)                         |
| Gentamycin                                                                           | 3 (100%)          | 3 (75%)                     | 21 (100%)                         |
| Ceftriaxone                                                                          | 3 (100%)          | 4 (100%)                    | 21 (100%)                         |
| Injectable metronidazole                                                             | 3 (100%)          | 2 (50%)                     | 21 (100%)                         |
| <b>Facilities with essential supplies for diagnosis and treatment of STIs</b>        | <b>2 (67%)</b>    | <b>1 (25%)</b>              | <b>21 (100%)</b>                  |
| <b>PROVISION OF PMTCT</b>                                                            |                   |                             |                                   |
| Administered ARVs to HIV+ mothers in maternity in the last 3 months                  | 3 (100%)          | 1 (33.3%)<br>ND* (1)        | 21 (100%)                         |
| Administered ARVs to newborns born to HIV+ mothers in maternity in the last 3 months | 3 (100%)          | 1 (25%)                     | 21 (100%)                         |
| ARVs for the mother                                                                  | 3 (100%)          | 3 (75%)                     | 19 (90.5%)                        |
| ARVs for the infant                                                                  | 3 (100%)          | 3 (75%)                     | 18 (90%)<br>ND* (1)               |
| <b>Facilities with essential supplies to provide PMTCT</b>                           | <b>3 (100%)</b>   | <b>1 (25%)</b>              | <b>18 (90%)</b><br><b>ND* (1)</b> |

\*No data

**Table G2. DRC: Facilities with essential supplies for diagnosis and treatment of STIs and for PMTCT (n=26)**

|                                                                                      | Hospital (n=1)  | Health center (n=25)  |
|--------------------------------------------------------------------------------------|-----------------|-----------------------|
| <b>DIAGNOSIS &amp; TREATMENT OF STIs</b>                                             |                 |                       |
| Performed syndromic or laboratory diagnosis and treatment of STIs in last 3 months   | 1 (100%)        | 22 (88%)              |
| Gentamycin                                                                           | 1 (100%)        | 6 (25%) ND* (1)       |
| Ceftriaxone                                                                          | 1 (100%)        | 3 (13%) ND* (2)       |
| Injectable metronidazole                                                             | 1 (100%)        | 3 (13%) ND* (2)       |
| <b>Facilities with essential supplies for diagnosis and treatment of STIs</b>        | <b>1 (100%)</b> | <b>2 (9%) ND* (2)</b> |
| <b>PROVISION OF PMTCT</b>                                                            |                 |                       |
| Administered ARVs to HIV+ mothers in maternity in the last 3 months                  | 1               | 0                     |
| Administered ARVs to newborns born to HIV+ mothers in maternity in the last 3 months | 1               | 1 (4%)                |
| ARVs for the mother                                                                  | 1               | 1 (4%) ND* (1)        |
| ARVs for the infant                                                                  | 1               | 0 ND* (1)             |
| <b>Facilities with essential supplies to provide PMTCT</b>                           | <b>1</b>        | <b>0</b>              |

\*No data

**Table G3. South Sudan: Facilities with essential supplies for diagnosis and treatment of STIs and for PMTCT (n=9)**

|                                                                                      | Hospital (n=1) | Health center (n=8) |
|--------------------------------------------------------------------------------------|----------------|---------------------|
| <b>DIAGNOSIS &amp; TREATMENT OF STIs</b>                                             |                |                     |
| Performed syndromic or laboratory diagnosis and treatment of STIs in last 3 months   | 1              | 7                   |
| Gentamycin                                                                           | 0              | 6 ND* (1)           |
| Ceftriaxone                                                                          | 0              | 6 ND* (1)           |
| Injectable metronidazole                                                             | 0              | 4 ND* (1)           |
| <b>Facilities with essential supplies for diagnosis and treatment of STIs</b>        | <b>0</b>       | <b>3</b>            |
| <b>PROVISION OF PMTCT</b>                                                            |                |                     |
| Administered ARVs to HIV+ mothers in maternity in the last 3 months                  | 0              | 0                   |
| Administered ARVs to newborns born to HIV+ mothers in maternity in the last 3 months | 0              | 0                   |
| ARVs for the mother                                                                  | ND*            | 0 ND* (1)           |
| ARVs for the infant                                                                  | ND*            | 0 ND* (1)           |
| <b>Facilities with essential supplies to provide PMTCT</b>                           | <b>0</b>       | <b>0</b>            |

\*No data
