# Supplementary material for: Progress and gaps in reproductive health services in three humanitarian settings: mixed-methods case studies
Source: PubMed Central journal article supplement (PMC4331815; doi:10.1186/1752-1505-9-s1-s3), 2015-02-02
Supplement: 1752-1505-9-S1-S3-S8.pdf [file 1752-1505-9-S1-S3-S8.pdf]

## Appendix H: Knowledge and attitudes of health care providers toward reproductive health services, selected questions

**Table H1. DRC and South Sudan: mean reproductive health knowledge scores among health care providers\*<sup>1</sup> (n=31)**

|                                                                                                                                                                                                                                                                                                                                                                                                                                                                                                                                                                                        | <b>DRC<br/>(n=13)</b> | <b>South Sudan<br/>(n=18)</b> |
|----------------------------------------------------------------------------------------------------------------------------------------------------------------------------------------------------------------------------------------------------------------------------------------------------------------------------------------------------------------------------------------------------------------------------------------------------------------------------------------------------------------------------------------------------------------------------------------|-----------------------|-------------------------------|
| <p>1. For a woman in labor, what observations do you make as you monitor her progress?</p> <ul style="list-style-type: none"> <li>a. Fetal heartbeat</li> <li>b. Color of amniotic fluid</li> <li>c. Degree of molding</li> <li>d. Dilatation of the cervix</li> <li>e. Descent of the head</li> <li>f. Uterine contractions</li> <li>g. Maternal blood pressure</li> <li>h. Maternal temperature</li> <li>i. Maternal pulse</li> </ul>                                                                                                                                                | 5.21 / 9              | 6.33 / 9                      |
| <p>2. When a woman arrives at the facility with heavy bleeding or develops severe bleeding after giving birth, what do you look for?</p> <ul style="list-style-type: none"> <li>a. Signs of shock (dizziness, low blood pressure)</li> <li>b. Amount of external blood</li> <li>c. Signs of anemia</li> <li>d. Damage to the genital tract</li> <li>e. Whether the uterus is contracted</li> <li>f. Retained products or retained placenta</li> <li>g. Full bladder</li> </ul>                                                                                                         | 2.93 / 7              | 3.44 / 7                      |
| <p>3. When a woman develops heavy bleeding after delivery, what do you do?</p> <ul style="list-style-type: none"> <li>a. Massage the fundus</li> <li>b. Give ergometrine or oxytocin (intravenous (IV) or intramuscular)</li> <li>c. Begin IV fluids</li> <li>d. Empty full bladder</li> <li>e. Take blood for hemoglobin and cross-matching</li> <li>f. Examine woman for lacerations</li> <li>g. Manually remove retained products</li> <li>h. Refer</li> </ul>                                                                                                                      | 2.71 / 8              | 3.5 / 8                       |
| <p>4. When a woman who just gave birth has not delivered the placenta, what do you do?</p> <ul style="list-style-type: none"> <li>a. Empty the bladder</li> <li>b. Check for signs of separation of placenta before controlled cord traction</li> <li>c. Give or repeat oxytocin</li> <li>d. Do manual removal of the placenta</li> <li>e. Administer IV fluids</li> <li>f. Monitor vital signs for shock and act</li> <li>g. Check that uterus is well contracted</li> <li>h. Determine blood type and cross-match</li> <li>i. Prepare operating theater</li> <li>j. Refer</li> </ul> | 3 / 10                | 2.44 / 10                     |

|                                                                                                                                                                                                                                                                                                                                                                                                                                                                                                                                                                                                                                    |                 |                  |
|------------------------------------------------------------------------------------------------------------------------------------------------------------------------------------------------------------------------------------------------------------------------------------------------------------------------------------------------------------------------------------------------------------------------------------------------------------------------------------------------------------------------------------------------------------------------------------------------------------------------------------|-----------------|------------------|
| <p>5. The last time you delivered a baby, what immediate care did you give the newborn?</p> <ol style="list-style-type: none"> <li>Clean the baby's mouth before the shoulder comes out</li> <li>Clean the baby's mouth, face, and nose</li> <li>Ensure the baby is breathing</li> <li>Ensure the baby is dry</li> <li>Observe for color</li> <li>Ensure baby is kept warm (skin-to-skin)</li> <li>Administer prophylaxis for the eyes</li> <li>Weigh the baby</li> <li>Care for the umbilical cord</li> <li>Initiate breastfeeding within the first 30 minutes</li> <li>Evaluate/examine newborn within the first hour</li> </ol> | <p>5 / 11</p>   | <p>6.78 / 11</p> |
| <p>6. What are the signs and symptoms of infection, or sepsis, in the newborn?</p> <ol style="list-style-type: none"> <li>Less movement (poor muscle tone)</li> <li>Poor or no breastfeeding</li> <li>Hypothermia or hyperthermia</li> <li>Restlessness or irritability</li> <li>Difficulty breathing or fast breathing</li> <li>Deep jaundice</li> <li>Severe abdominal distention</li> </ol>                                                                                                                                                                                                                                     | <p>3.14 / 7</p> | <p>2.89 / 7</p>  |
| <p>7. When a newborn weighs less than 2.5kgs, what special care do you provide?</p> <ol style="list-style-type: none"> <li>Make sure the baby is warm (skin-to-skin/kangaroo technique)</li> <li>Provide extra support to the mother to establish breastfeeding</li> <li>Monitor ability to breastfeed</li> <li>Monitor baby for the first 24 hours</li> <li>Ensure infection prevention</li> </ol>                                                                                                                                                                                                                                | <p>1.64 / 5</p> | <p>3.17 / 5</p>  |
| <p>8. Which FP methods can a woman use immediately post-partum?</p> <ol style="list-style-type: none"> <li>IUD</li> <li>Tubal ligation</li> <li>Condoms</li> <li>Lactational Amenorrhea Method</li> </ol>                                                                                                                                                                                                                                                                                                                                                                                                                          | <p>1.43 / 4</p> | <p>1 / 4</p>     |
| <p>9. Which FP methods can a woman who is breastfeeding begin using 6 weeks after delivery?</p> <ol style="list-style-type: none"> <li>IUD</li> <li>Tubal ligation</li> <li>Condoms</li> <li>Progestin-only pills</li> </ol>                                                                                                                                                                                                                                                                                                                                                                                                       | <p>2.07 / 4</p> | <p>1.39 / 4</p>  |
| <p>10. When you counsel a woman for FP, what do you do/discuss?</p> <ol style="list-style-type: none"> <li>Ask whether she has used FP before</li> <li>Ask about her reproductive goals</li> <li>Check for medical complications</li> <li>Tell her about dual protection</li> <li>Tell her about all FP methods</li> </ol>                                                                                                                                                                                                                                                                                                         | <p>2 / 5</p>    | <p>2.17 / 5</p>  |

|                                                                                                                                                                                                                                                                                                                                                                                                                                                                                                                                                                                                                                                  |           |           |
|--------------------------------------------------------------------------------------------------------------------------------------------------------------------------------------------------------------------------------------------------------------------------------------------------------------------------------------------------------------------------------------------------------------------------------------------------------------------------------------------------------------------------------------------------------------------------------------------------------------------------------------------------|-----------|-----------|
| <p>11. What are the immediate complications of an unsafe abortion?</p> <ul style="list-style-type: none"> <li>a. Sepsis</li> <li>b. Bleeding</li> <li>c. Genital injuries</li> <li>d. Abdominal injuries</li> <li>e. Shock</li> </ul>                                                                                                                                                                                                                                                                                                                                                                                                            | 2.71 / 5  | 3 / 5     |
| <p>12. When you see a woman with complications from an unsafe or incomplete abortion, what do you do?</p> <ul style="list-style-type: none"> <li>a. Do a vaginal exam</li> <li>b. Assess vaginal bleeding</li> <li>c. Assess vital signs</li> <li>d. Begin IV fluids</li> <li>e. Begin antibiotics</li> <li>f. Do (manual/electric) vacuum aspiration</li> <li>g. Do dilatation with curettage or evacuation</li> <li>h. Provide misoprostol</li> <li>i. Provide counseling</li> <li>j. Refer</li> </ul>                                                                                                                                         | 3.93 / 10 | 4.06 / 10 |
| <p>13. What information do you give patients who were treated for an incomplete or unsafe abortion?</p> <ul style="list-style-type: none"> <li>a. Information on how to prevent STIs/HIV</li> <li>b. Information about when a woman can conceive again</li> <li>c. Counseling on family planning and services</li> <li>d. Refer for FP or provide FP methods</li> <li>e. Information on social support</li> <li>f. Information about the consequences of an unsafe abortion</li> </ul>                                                                                                                                                           | 2 / 6     | 2.39 / 6  |
| <p>14. What do you do when someone presents with signs of an STI?</p> <ul style="list-style-type: none"> <li>a. Diagnose and provide antibiotics according to the syndromic approach</li> <li>b. Counsel on contact tracing</li> <li>c. Explain how to use and provide condoms</li> <li>d. Counsel on HIV and offer VCT</li> <li>e. Refer</li> </ul>                                                                                                                                                                                                                                                                                             | 2.43 / 5  | 2.83 / 5  |
| <p>15. When a woman presents after a rape, what do you do?</p> <ul style="list-style-type: none"> <li>a. Encourage her to report to police</li> <li>b. Facilitate filling out the police report</li> <li>c. Take history and do an examination</li> <li>d. Take forensic evidence</li> <li>e. Counsel for pre- and post-HIV testing</li> <li>f. Counsel about pregnancy prevention</li> <li>g. Provide emergency contraception</li> <li>h. Provide post-exposure prophylaxis for HIV</li> <li>i. Provide antibiotics to prevent STIs</li> <li>j. Request that she do urine, vaginal smear/swabs, and/or blood exams</li> <li>k. Refer</li> </ul> | 4.71 / 11 | 4.28 / 11 |

\*Scores are out of the total possible score for each item, which is based on a pre-defined list of essential steps for delivering good quality care.

<sup>1</sup> Due to challenges in data management, means from Burkina Faso could not be calculated. Instead, the descriptive summaries of providers' responses were analyzed.

**Table H2. DRC and South Sudan: mean reproductive health attitude scores among health care providers\*<sup>1</sup> (n=31)**

|                                                                                                                          | <b>DRC<br/>(n=13)</b> | <b>South Sudan<br/>(n=18)</b> |
|--------------------------------------------------------------------------------------------------------------------------|-----------------------|-------------------------------|
| 1. Visiting a health facility to check on a pregnancy's progress is a good idea for a pregnant woman.                    | 3.86                  | 3.94                          |
| 2. Delivering a baby at a health facility is safer than delivering a baby at home.                                       | 3.93                  | 3.89                          |
| 3. Within the couple, both the wife and the husband should have equal say in important decisions.                        | 3.43                  | 3.61                          |
| 4. The more children a mother has, the more respected she is in the community.                                           | 2.43                  | 3.28                          |
| 5. Men should be responsible for choosing how many children their wife/wives will have.                                  | 2.79                  | 3.28                          |
| 6. Family planning should be available to every woman who wants to use a method.                                         | 3.36                  | 3.67                          |
| 7. A woman should be able to obtain a family planning method without her husband's presence.                             | 2.57                  | 2.72                          |
| 8. IUDs can be a good method for women who have no children.                                                             | 2.07                  | 2.06                          |
| 9. Adolescent, unmarried girls should be allowed to obtain family planning if they want.                                 | 3.14                  | 3.22                          |
| 10. Young unmarried men and women need to know how to prevent pregnancies.                                               | 3.57                  | 3.61                          |
| 11. Young unmarried women should be required to get their parents' consent in order to receive a family planning method. | 2.86                  | 3                             |
| 12. Young unmarried men and women should be educated about sex and reproduction                                          | 3.86                  | 3.61                          |

\*All scores are based on Likert scale responses to each statement: strongly agree (4), agree (3), disagree (2), and strongly disagree (1). Statements 4, 5, and 11 were reverse coded. All items are scored out of a total possible score of 4 with higher means signalling attitudes that promote equitable and good quality RH services.

<sup>1</sup> Due to challenges in data management, means from Burkina Faso could not be calculated. Instead, the descriptive summaries of providers' responses were analyzed.
